# Supplementary material for: Selective determination of mefenamic acid in the presence of 1000-fold excess paracetamol and caffeine using a multiwalled carbon nanotube–polymer composite electrode
Source: Royal Society of Chemistry journal article supplement (doi:10.1039/c5ay00300h), 2015-01-01

## Supporting information

**Selective determination of mefenamic acid in the presence of 1000-fold excess paracetamol and caffeine using multiwalled carbon nanotubes-polymer composite electrode**

**K. Rajalakshmi, S. Abraham John\***

Centre for Nanoscience and Nanotechnology  
Department of Chemistry, Gandhigram Rural Institute  
Gandhigram – 624 302, Dindigul, India.

---

\*Corresponding author: Tel: +91 451 245 2371; Fax: + 91 451 245 3031

E-mail: [abrajohn@yahoo.co.in](mailto:abrajohn@yahoo.co.in); [s.abrahamjohn@ruraluniv.ac.in](mailto:s.abrahamjohn@ruraluniv.ac.in);

**Fig.S1.** CVs obtained for 0.5 mM of MA at (a) bare GC, (b) GC/p-ATT, (c) GC/OD/FMWCNTs and (d) GC/OD/FMWCNTs/p-ATT composite modified electrodes in PBS (pH 7.2) at a scan rate of 50 mV s<sup>-1</sup> (dashed lines are the respective fourth cycles).

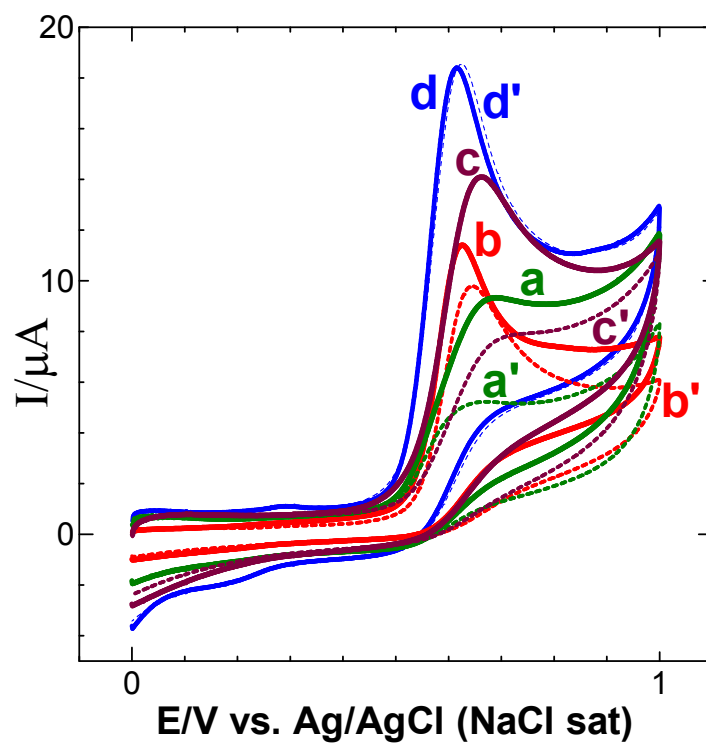

**Fig.S2. (A)** DPVs obtained for (a) PBS only (b) after spiked with MA drug sample, **(B)** DPVs obtained for (curve a-j) each addition of 25  $\mu\text{g}$  of MA at GC/OD/FMWCNT/p-ATT modified electrode in 0.2 M PBS (pH 7.2) **Inset:** Plot obtained for current vs. concentration of MA.

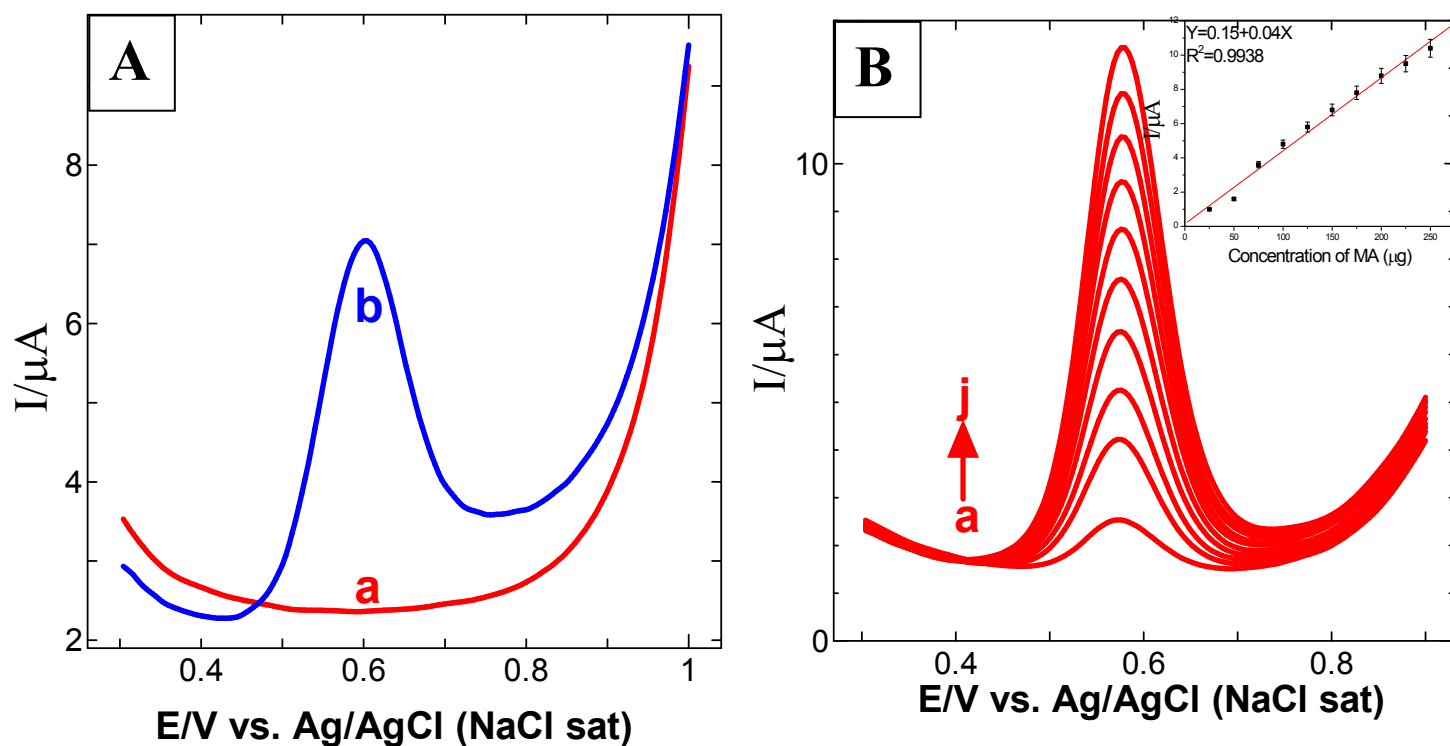

Supplement: c5ay00300h1.pdf [file c5ay00300h1.pdf]
